# Supplementary material for: PVDF Composite Membranes with Hydrophobically-Capped CuONPs for Direct-Contact Membrane Distillation
Source: MDPI journal article supplement (doi:10.3390/nano11061497), 2021-06-05
Supplement: s1 [file s1]

# PVDF Composite Membranes with Hydrophobically-Capped CuONPs for Direct-Contact Membrane Distillation

César Saldías <sup>1</sup>, Claudio A. Terraza <sup>2,3</sup>, Angel Leiva <sup>1</sup>, Joachim Koschikowski <sup>4</sup>, Daniel Winter <sup>4</sup>,  
Alain Tundidor-Camba <sup>2,3,\*</sup> and Rudy Martin-Trasanco <sup>5,\*</sup>

<sup>1</sup> Department of Physical Chemistry, Faculty of Chemistry and of Pharmacy, Pontificia Universidad Católica de Chile, P.O. Box 306, Post 22, Santiago 7820436, Chile; casaldia@uc.cl (C.S.); aleivac@uc.cl (A.L.)

<sup>2</sup> Research Laboratory for Organic Polymers (RLOP), Faculty of Chemistry and of Pharmacy, Pontificia Universidad Católica de Chile, P.O. Box 306, Post 22, Santiago 7820436, Chile; cterraza@uc.cl (C.T.)

<sup>3</sup> UC Energy Research Center, Pontificia Universidad Católica de Chile, P.O. Box 306, Post 22, Santiago 7820436, Chile

<sup>4</sup> Fraunhofer Institute for Solar Energy Systems (ISE), 79110 Freiburg, Germany; Joachim.koschikowski@ise.fraunhofer.de (J.K.); daniel.winter@ise.fraunhofer.de (D.W.)

<sup>5</sup> Departamento de Química, Universidad Tecnológica Metropolitana, Las Palmeras 3360, 8940577 Santiago, Chile

\* Correspondence: atundido@uc.cl (A.T.-C.); rudy.martint@utem.cl (R.M.-T.)

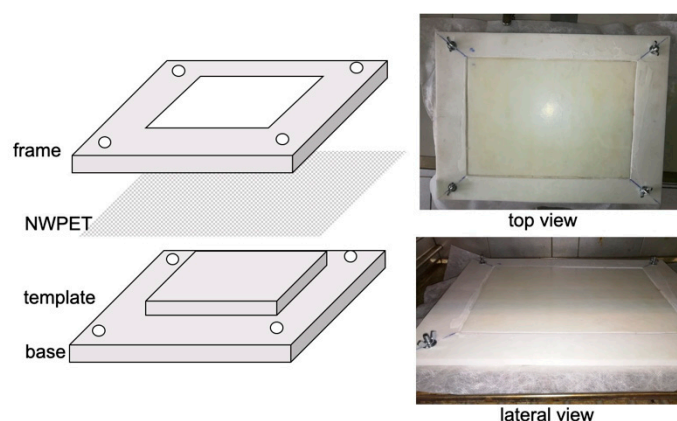

**Figure S1.** PTFE scaffold of 210 mm × 297 mm, for preparing PVDF composite membranes. Right: montage set-up of the hand-made PTFE device to prepare the membranes. Left: top and lateral view of prepared membranes.

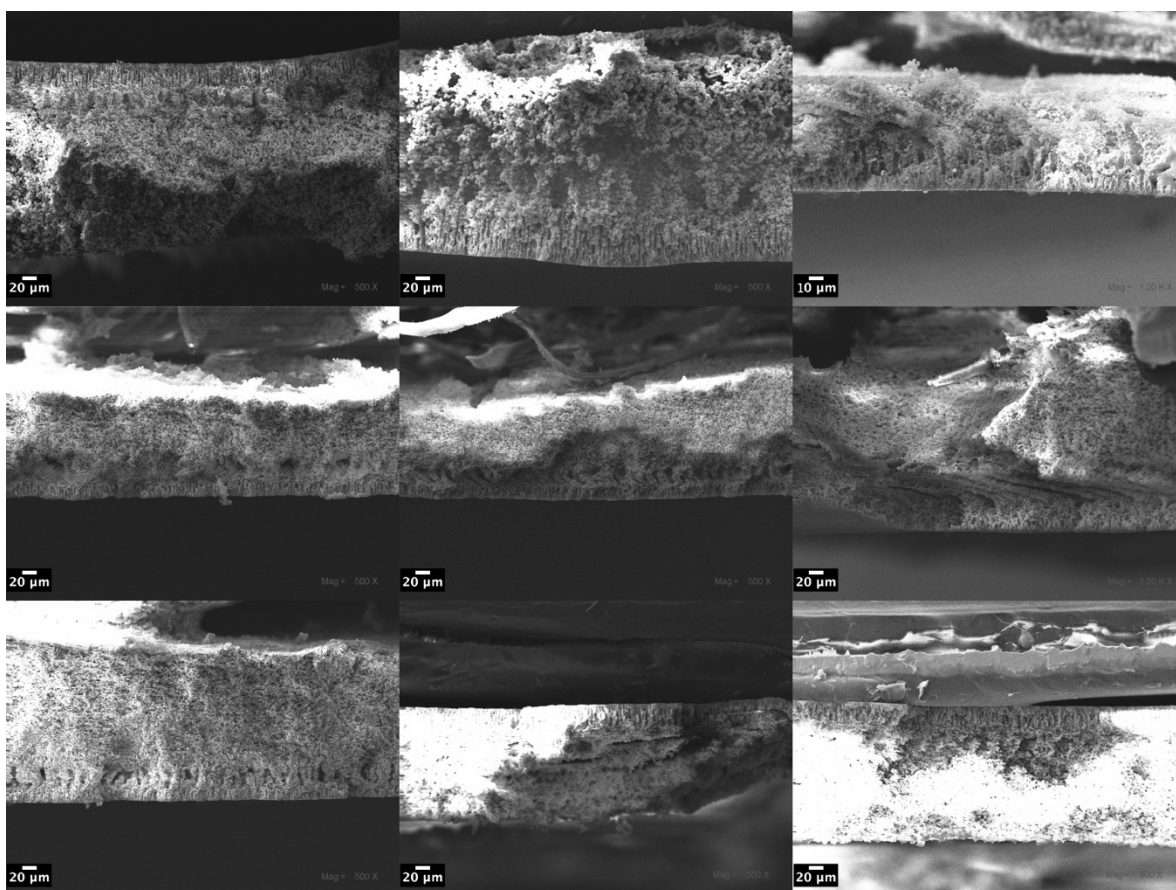

**Figure S2.** Cross-section SEM micrographs of prepared membranes with different types of nanoparticles at different wt%. First row: CuONPs; second row: CuONPs@CH; third row CuONPs@CF. Nanoparticle concentration, from left to right, 2%, 5% and 10%. Thickness=  $240 \pm 40$   $\mu\text{m}$ .

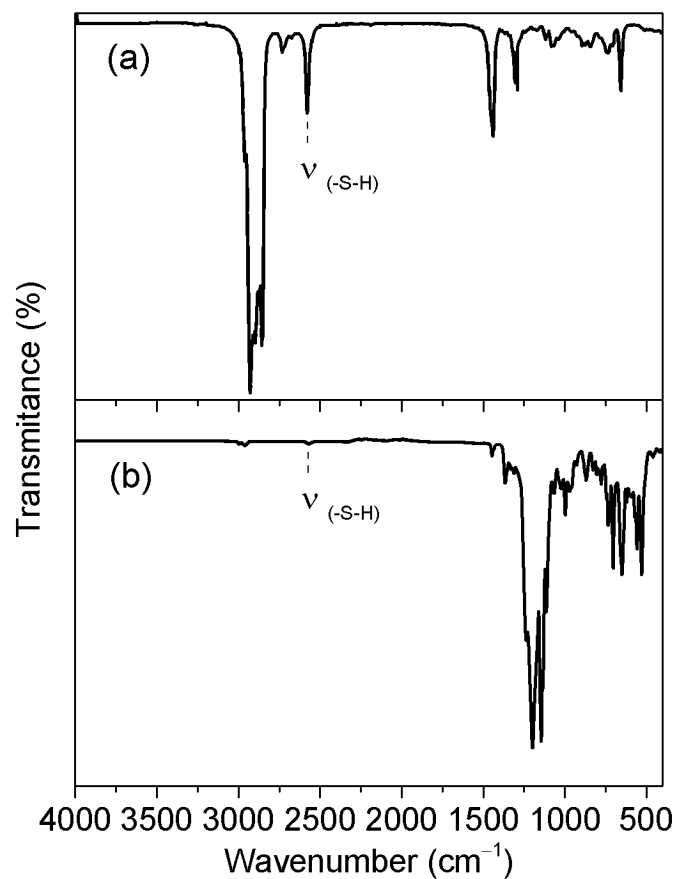

**Figure S3.** FT-IR spectra of (a) n-octanethiol and (b) 1H,1H,2H,2H-perfluorodecanethiol.

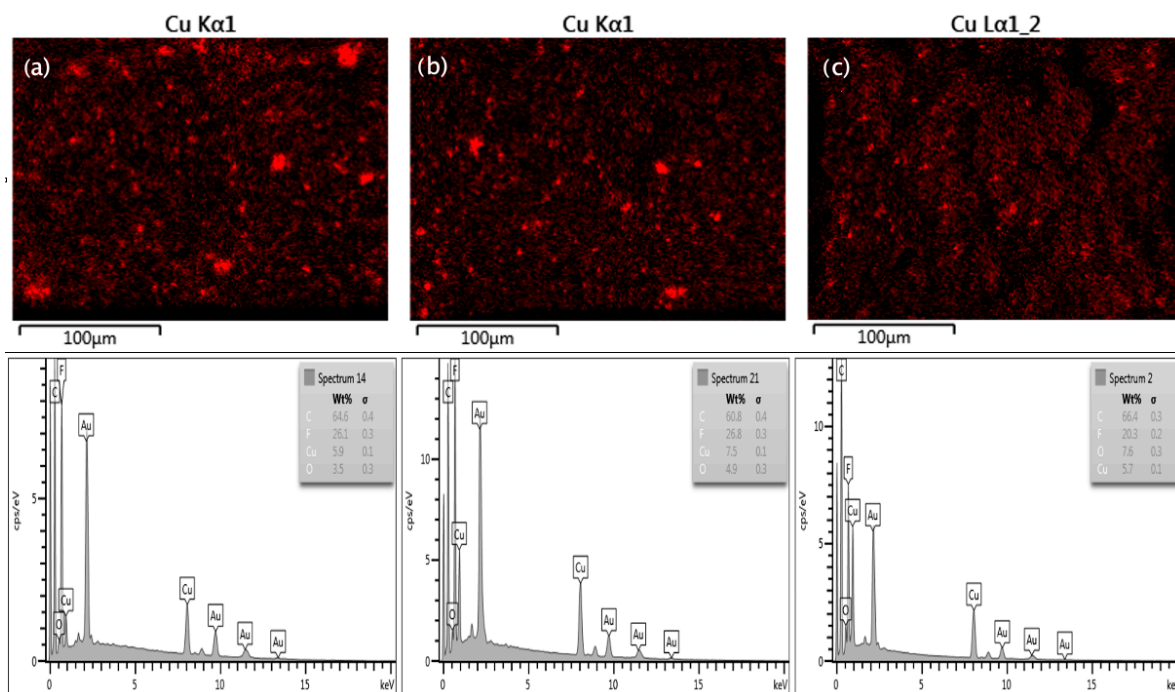

**Figure S4.** EDS spectrum of nanoparticles at concentration of 10% CuONPs (a), CuONPs@CH (b) and CuONPs@CF (c).
